# Supplementary material for: Detection of Nail Oncometabolite SAICAR in Oral Cancer Patients and Its Molecular Interactions with PKM2 Enzyme
Source: MDPI journal article supplement (doi:10.3390/ijerph182111225), 2021-10-26
Supplement: s1 [file s1]

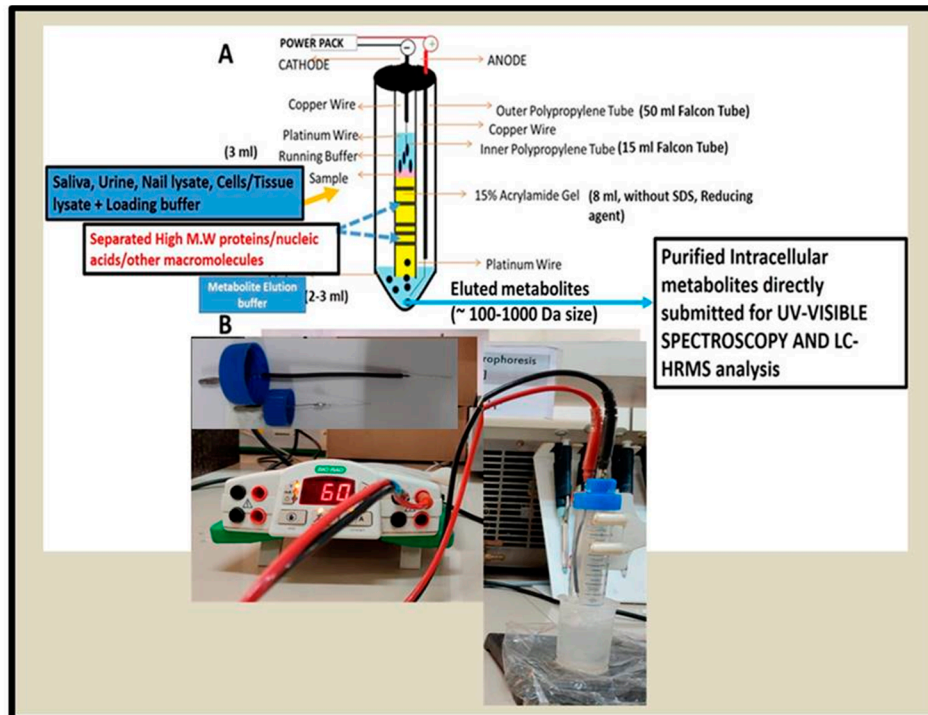

**Figure S1.** A model on a novel vertical tube gel electrophoresis (VTGE) system. (A) Flow diagram of VTGE system. (B) A running model on VTGE system.
